# Supplementary material for: Economic Evaluations of Stepped Models of Care for Depression and Anxiety and Associated Implementation Strategies: A Review of Empiric Studies
Source: PubMed Central journal article supplement (PMC6588024; doi:10.5334/ijic.4157), 2019-06-21
Supplement: ijic-19-2-4157-s1.pdf [file ijic-19-2-4157-s1.pdf]

## Supplementary material

### Medline Search Review 1: Scoping review of economic evaluations of Stepped care services for anxiety and depression.

- 1 mental health/ or anxiety disorders/ or mood disorders/ or depressive disorder/
- 2 depress\*.mp. [mp=title, abstract, original title, name of substance word, subject heading word, keyword heading word, protocol supplementary concept word, rare disease supplementary concept word, unique identifier, synonyms]
- 3 anxiety.mp. [mp=title, abstract, original title, name of substance word, subject heading word, keyword heading word, protocol supplementary concept word, rare disease supplementary concept word, unique identifier, synonyms]
- 4 1 or 2 or 3
- 5 stepped care.mp.
- 6 (stepped adj2 treatment).mp. [mp=title, abstract, original title, name of substance word, subject heading word, keyword heading word, protocol supplementary concept word, rare disease supplementary concept word, unique identifier, synonyms]
- 7 5 or 6
- 8 economics/ or resource allocation/ or health care rationing/
- 9 "costs and cost analysis"/ or "cost allocation"/ or cost-benefit analysis/ or "cost control"/ or "cost of illness"/ or "cost sharing"/ or health care costs/ or health expenditures/
- 10 economics, dental/ or economics, hospital/ or hospital costs/ or economics, medical/ or economics, nursing/ or economics, pharmaceutical/
- 11 (cost adj2 (effective\* or utilit\* or benefit\* or minimi\* or analy\* or outcome\*)).mp. [mp=title, abstract, original title, name of substance word, subject heading word, keyword heading word, protocol supplementary concept word, rare disease supplementary concept word, unique identifier, synonyms]
- 12 (value adj2 (money or monetary)).mp. [mp=title, abstract, original title, name of substance word, subject heading word, keyword heading word, protocol supplementary concept word, rare disease supplementary concept word, unique identifier, synonyms]
- 13 markov chains/
- 14 (markov adj2 model).mp. [mp=title, abstract, original title, name of substance word, subject heading word, keyword heading word, protocol supplementary concept word, rare disease supplementary concept word, unique identifier, synonyms]
- 15 monte carlo method/
- 16 monte carlo.mp. [mp=title, abstract, original title, name of substance word, subject heading word, keyword heading word, protocol supplementary concept word, rare disease supplementary concept word, unique identifier, synonyms]
- 17 "economic model\*".mp. [mp=title, abstract, original title, name of substance word, subject heading word, keyword heading word, protocol supplementary concept word, rare disease supplementary concept word, unique identifier, synonyms]
- 18 decision theory/ or decision trees/
- 19 (decision\* adj2 (tree\* or analy\* or model\*)).mp. [mp=title, abstract, original title, name of substance word, subject heading word, keyword heading word, protocol supplementary concept word, rare disease supplementary concept word, unique identifier, synonyms]
- 20 (cochrane or (health adj2 technology assessment) or evidence report).mp. [mp=title, abstract, original title, name of substance word, subject heading word, keyword heading word, protocol supplementary concept word, rare disease supplementary concept word, unique identifier, synonyms]
- 21 ((meta adj analysis) or (system\* adj review)).mp. [mp=title, abstract, original title, name of substance word, subject heading word, keyword heading word, protocol supplementary concept word, rare disease supplementary concept word, unique identifier, synonyms]
- 22 (comparative adj3 (efficacy or effectiveness)).mp. [mp=title, abstract, original title, name of substance word, subject heading word, keyword heading word, protocol supplementary concept word, rare disease supplementary concept word, unique identifier, synonyms]
- 23 (outcome\* research or relative effectiveness).mp. [mp=title, abstract, original title, name of substance word, subject heading word, keyword heading word, protocol supplementary concept word, rare disease supplementary concept word, unique identifier, synonyms]
- 24 8 or 9 or 10 or 11 or 12 or 13 or 14 or 15 or 16 or 17 or 18 or 19 or 20 or 21 or 22 or 23
- 46 4 and 7 and 24

## Medline Search Review 2: Scoping review of economic evaluations of StepCare implementation strategies for anxiety and depression

- 1 mental health/ or anxiety disorders/ or mood disorders/ or depressive disorder/
- 2 depress\*.mp. [mp=title, abstract, original title, name of substance word, subject heading word, keyword heading word, protocol supplementary concept word, rare disease supplementary concept word, unique identifier, synonyms]
- 3 anxiety.mp. [mp=title, abstract, original title, name of substance word, subject heading word, keyword heading word, protocol supplementary concept word, rare disease supplementary concept word, unique identifier, synonyms]
- 4 1 or 2 or 3
- 5 stepped care.mp.
- 6 (stepped adj2 treatment).mp. [mp=title, abstract, original title, name of substance word, subject heading word, keyword heading word, protocol supplementary concept word, rare disease supplementary concept word, unique identifier, synonyms]
- 7 5 or 6
- 8 economics/ or resource allocation/ or health care rationing/
- 9 "costs and cost analysis"/ or "cost allocation"/ or cost-benefit analysis/ or "cost control"/ or "cost of illness"/ or "cost sharing"/ or health care costs/ or health expenditures/
- 10 economics, dental/ or economics, hospital/ or hospital costs/ or economics, medical/ or economics, nursing/ or economics, pharmaceutical/
- 11 (cost adj2 (effective\* or utilit\* or benefit\* or minimi\* or analy\* or outcome\*)).mp. [mp=title, abstract, original title, name of substance word, subject heading word, keyword heading word, protocol supplementary concept word, rare disease supplementary concept word, unique identifier, synonyms]
- 12 (value adj2 (money or monetary)).mp. [mp=title, abstract, original title, name of substance word, subject heading word, keyword heading word, protocol supplementary concept word, rare disease supplementary concept word, unique identifier, synonyms]
- 13 markov chains/
- 14 (markov adj2 model).mp. [mp=title, abstract, original title, name of substance word, subject heading word, keyword heading word, protocol supplementary concept word, rare disease supplementary concept word, unique identifier, synonyms]
- 15 monte carlo method/
- 16 monte carlo.mp. [mp=title, abstract, original title, name of substance word, subject heading word, keyword heading word, protocol supplementary concept word, rare disease supplementary concept word, unique identifier, synonyms]
- 17 "economic model".mp. [mp=title, abstract, original title, name of substance word, subject heading word, keyword heading word, protocol supplementary concept word, rare disease supplementary concept word, unique identifier, synonyms]
- 18 decision theory/ or decision trees/
- 19 (decision\* adj2 (tree\* or analy\* or model\*)).mp. [mp=title, abstract, original title, name of substance word, subject heading word, keyword heading word, protocol supplementary concept word, rare disease supplementary concept word, unique identifier, synonyms]
- 20 (cochrane or (health adj2 technology assessment) or evidence report).mp. [mp=title, abstract, original title, name of substance word, subject heading word, keyword heading word, protocol supplementary concept word, rare disease supplementary concept word, unique identifier, synonyms]
- 21 ((meta adj analysis) or (system\* adj review)).mp. [mp=title, abstract, original title, name of substance word, subject heading word, keyword heading word, protocol supplementary concept word, rare disease supplementary concept word, unique identifier, synonyms]
- 22 (comparative adj3 (efficacy or effectiveness)).mp. [mp=title, abstract, original title, name of substance word, subject heading word, keyword heading word, protocol supplementary concept word, rare disease supplementary concept word, unique identifier, synonyms]
- 23 (outcome\* research or relative effectiveness).mp. [mp=title, abstract, original title, name of substance word, subject heading word, keyword heading word, protocol supplementary concept word, rare disease supplementary concept word, unique identifier, synonyms]
- 24 8 or 9 or 10 or 11 or 12 or 13 or 14 or 15 or 16 or 17 or 18 or 19 or 20 or 21 or 22 or 23

25 implement\*.mp. [mp=title, abstract, original title, name of substance word, subject heading word, keyword  
heading word, protocol supplementary concept word, rare disease supplementary concept word, unique  
26 identifier, synonyms]  
dissemin\*.mp. [mp=title, abstract, original title, name of substance word, subject heading word, keyword  
27 heading word, protocol supplementary concept word, rare disease supplementary concept word, unique  
identifier, synonyms]  
adopt\*.mp. [mp=title, abstract, original title, name of substance word, subject heading word, keyword  
28 heading word, protocol supplementary concept word, rare disease supplementary concept word, unique  
identifier, synonyms]  
practice\*.mp. [mp=title, abstract, original title, name of substance word, subject heading word, keyword  
29 heading word, protocol supplementary concept word, rare disease supplementary concept word, unique  
identifier, synonyms]  
(organizational adj change\*).mp. [mp=title, abstract, original title, name of substance word, subject heading  
30 word, keyword heading word, protocol supplementary concept word, rare disease supplementary concept  
word, unique identifier, synonyms]  
diffus\*.mp. [mp=title, abstract, original title, name of substance word, subject heading word, keyword heading  
31 word, protocol supplementary concept word, rare disease supplementary concept word, unique identifier,  
synonyms]  
(system adj2 change\*).mp. [mp=title, abstract, original title, name of substance word, subject heading word,  
32 keyword heading word, protocol supplementary concept word, rare disease supplementary concept word,  
unique identifier, synonyms]  
quality improvement.mp. [mp=title, abstract, original title, name of substance word, subject heading word,  
33 keyword heading word, protocol supplementary concept word, rare disease supplementary concept word,  
unique identifier, synonyms]  
transform\*.mp. [mp=title, abstract, original title, name of substance word, subject heading word, keyword  
34 heading word, protocol supplementary concept word, rare disease supplementary concept word, unique  
identifier, synonyms]  
sustainab\*.mp. [mp=title, abstract, original title, name of substance word, subject heading word, keyword  
35 heading word, protocol supplementary concept word, rare disease supplementary concept word, unique  
identifier, synonyms]  
institutional\*.mp. [mp=title, abstract, original title, name of substance word, subject heading word, keyword  
36 heading word, protocol supplementary concept word, rare disease supplementary concept word, unique  
identifier, synonyms]  
routin\*.mp. [mp=title, abstract, original title, name of substance word, subject heading word, keyword  
37 heading word, protocol supplementary concept word, rare disease supplementary concept word, unique  
identifier, synonyms]  
maintenance.mp. [mp=title, abstract, original title, name of substance word, subject heading word, keyword  
38 heading word, protocol supplementary concept word, rare disease supplementary concept word, unique  
identifier, synonyms]  
capacity.mp. [mp=title, abstract, original title, name of substance word, subject heading word, keyword  
39 heading word, protocol supplementary concept word, rare disease supplementary concept word, unique  
identifier, synonyms]  
incorporat\*.mp. [mp=title, abstract, original title, name of substance word, subject heading word, keyword  
40 heading word, protocol supplementary concept word, rare disease supplementary concept word, unique  
identifier, synonyms]  
adher\*.mp. [mp=title, abstract, original title, name of substance word, subject heading word, keyword  
41 heading word, protocol supplementary concept word, rare disease supplementary concept word, unique  
identifier, synonyms]  
((polic\* or practic\* or progra\* or innovat\*) adj5 (perform\* or feedback or prompt\* or reminder\* or incentive\* or  
42 penal\* or communic\* or social market\* or profession\* develop\* or netwrok\* or leadership or opinion leader\* or  
consensus process\* or change manag\* or train\* or audit\*)).mp. [mp=title, abstract, original title, name of  
substance word, subject heading word, keyword heading word, protocol supplementary concept word, rare  
43 disease supplementary concept word, unique identifier, synonyms]  
integrat\*.mp. [mp=title, abstract, original title, name of substance word, subject heading word, keyword  
44 heading word, protocol supplementary concept word, rare disease supplementary concept word, unique  
identifier, synonyms]  
scal\* up.mp. [mp=title, abstract, original title, name of substance word, subject heading word, keyword  
45 heading word, protocol supplementary concept word, rare disease supplementary concept word, unique  
46 identifier, synonyms]  
(implement\* adj3 strateg\*).mp. [mp=title, abstract, original title, name of substance word, subject heading  
word, keyword heading word, protocol supplementary concept word, rare disease supplementary concept  
word, unique identifier, synonyms]  
25 or 26 or 27 or 28 or 29 or 30 or 31 or 32 or 33 or 34 or 35 or 36 or 37 or 38 or 39 or 40 or 41 or 42 or 43 or 44  
4 and 7 and 24 and 45
